# Supplementary material for: Category learning with imperfect feedback
Source: Royal Society of Chemistry journal article supplement (doi:10.1039/c3an02175k), 2011-01-01
Supplement: c3an02175k2.pdf [file c3an02175k2.pdf]

## Supplementary Materials

**Supplementary Figure 1:** Raman spectra of calcium fluoride slides, examined as-received.

**Supplementary Figure 2:** Geometric properties of drying DJC synovial fluid drops.

**Supplementary Figure 3:** Low magnification images of dried normal synovial fluid drops as a function of concentration and wetting properties. Upper row: CaF<sub>2</sub>, Lower row: gold-coated glass.

**Supplementary Figure 4:** Low magnification images of dried DJC synovial fluid drops as a function of concentration and wetting properties. Upper row: CaF<sub>2</sub>, Lower row: gold-coated glass.

**Supplementary Figure 5:** Raman spectra of synovial fluid collected at various points along a synovial fluid drop. The depicted synovial fluid is from an individual patient and stored in a specimen vial enriched with proteases and anti-coagulants. The presence of the proteases and anti-coagulants prohibited good classification of bulk fluid tests, such as viscosity. The impurities, whose presence was indicated by the marked bands (\*) in the bottom spectrum, were easily separated by the drop deposition process and enabled Raman classification of synovial fluid from each patient.

**Supplementary Videos:** Videos 1-3 show a time-course of synovial fluid (normal and DJC) and plasma drying on gold-coated glass. A side-profile and overhead image was collected every second and compiled into a video. The side profile images show that the contact line remains pinned. Overhead images capture the formation of radial cracks and fern-shaped crystals. For reference, Video 4 compares the drying behavior of plasma with water.

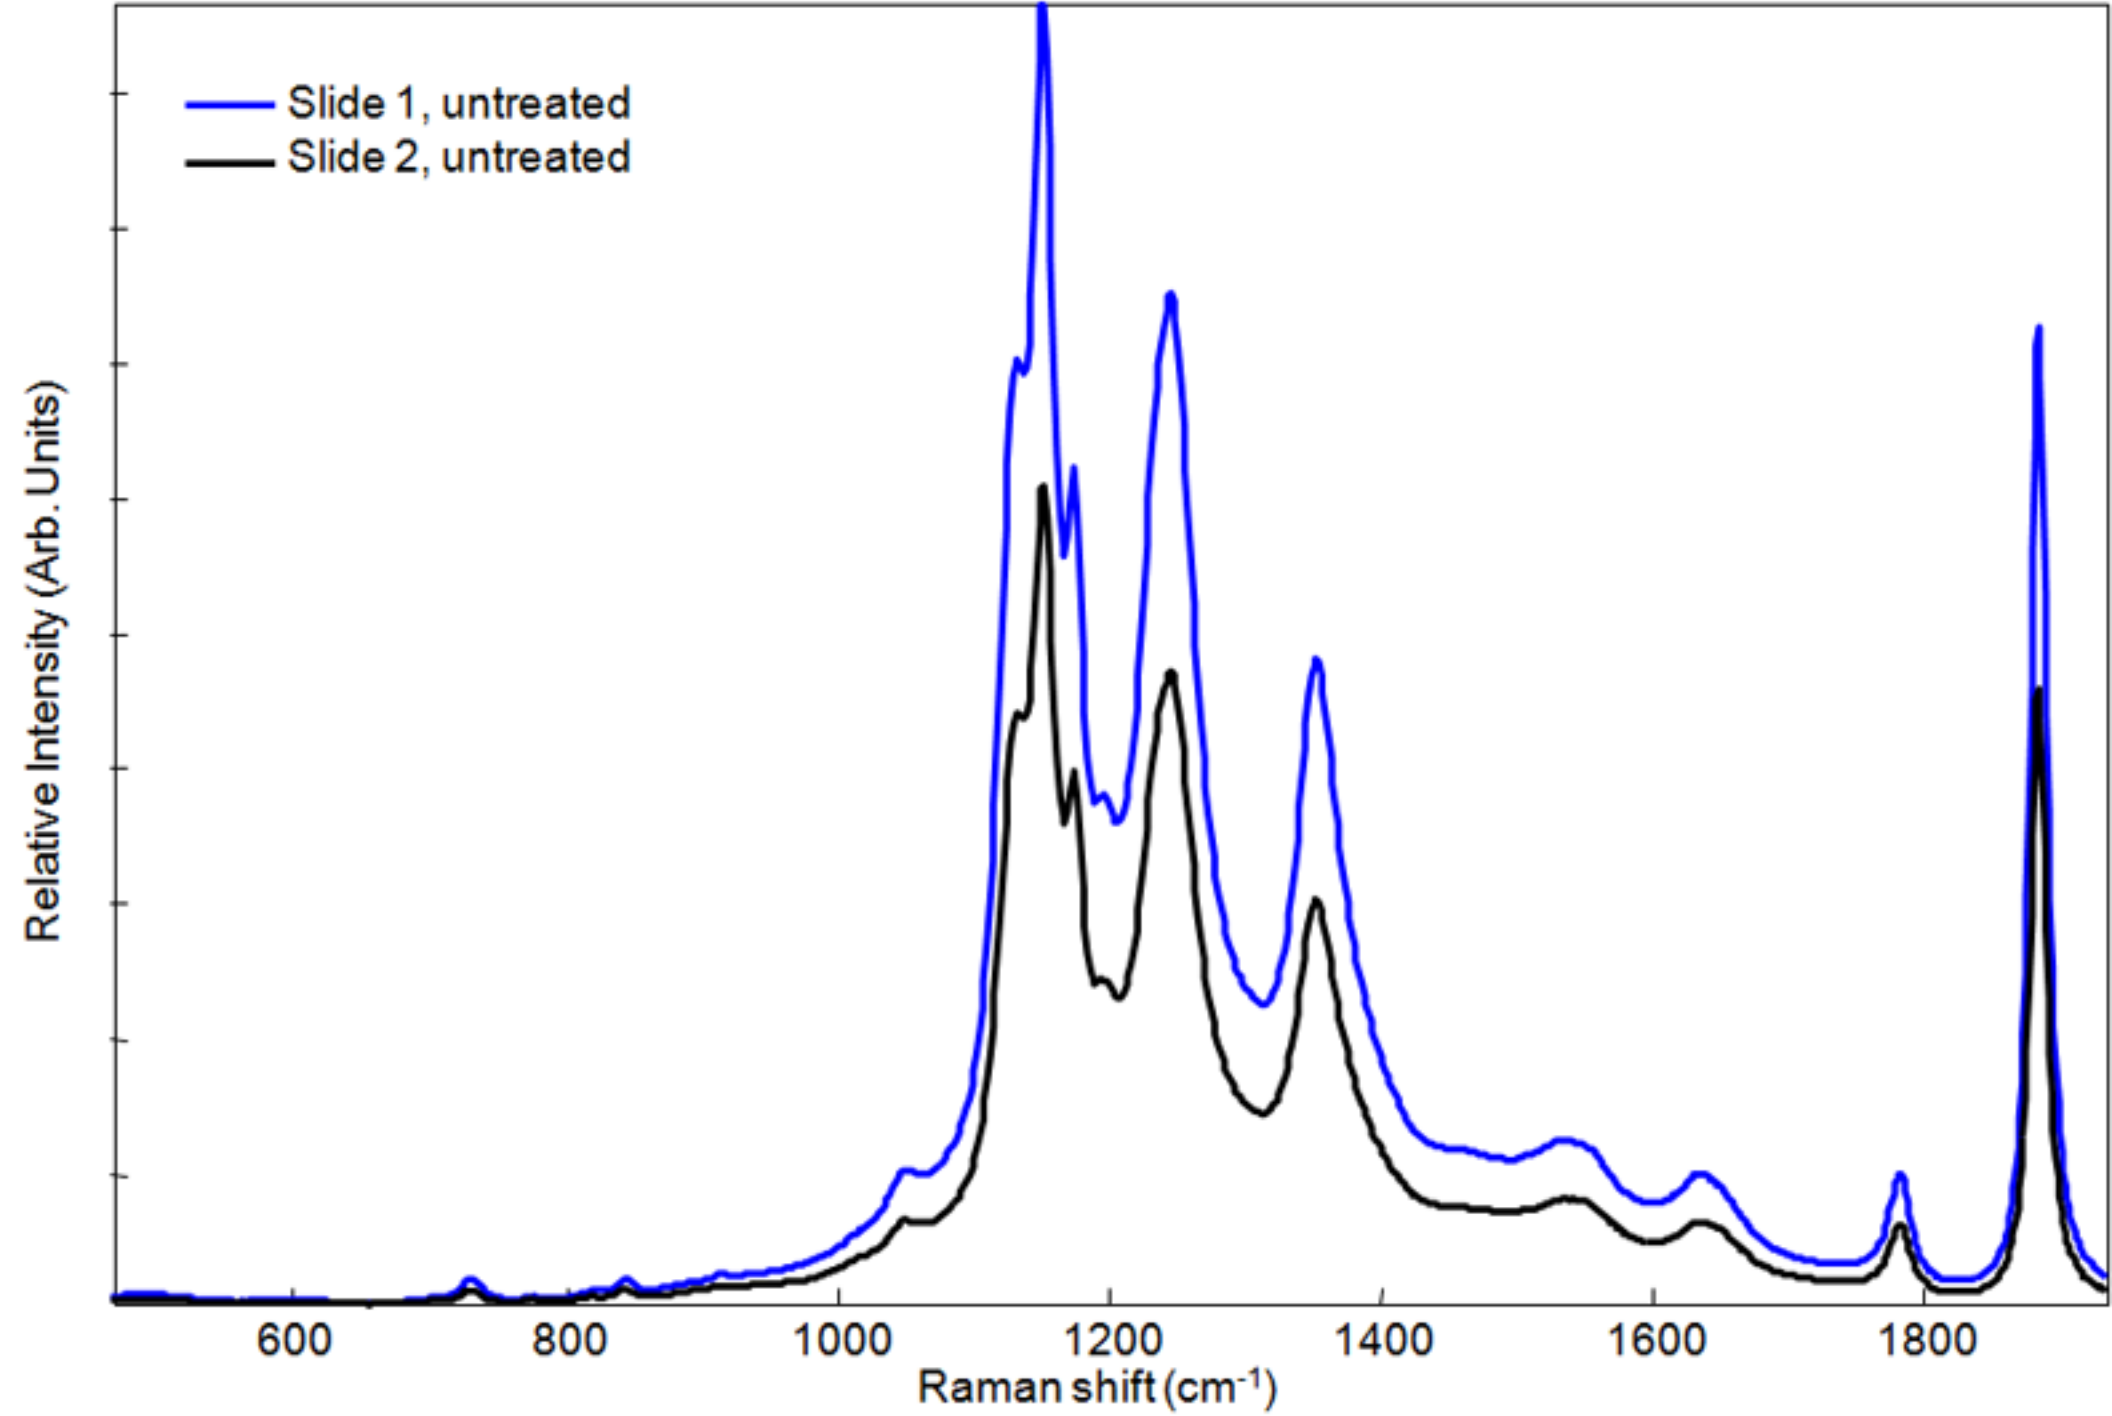

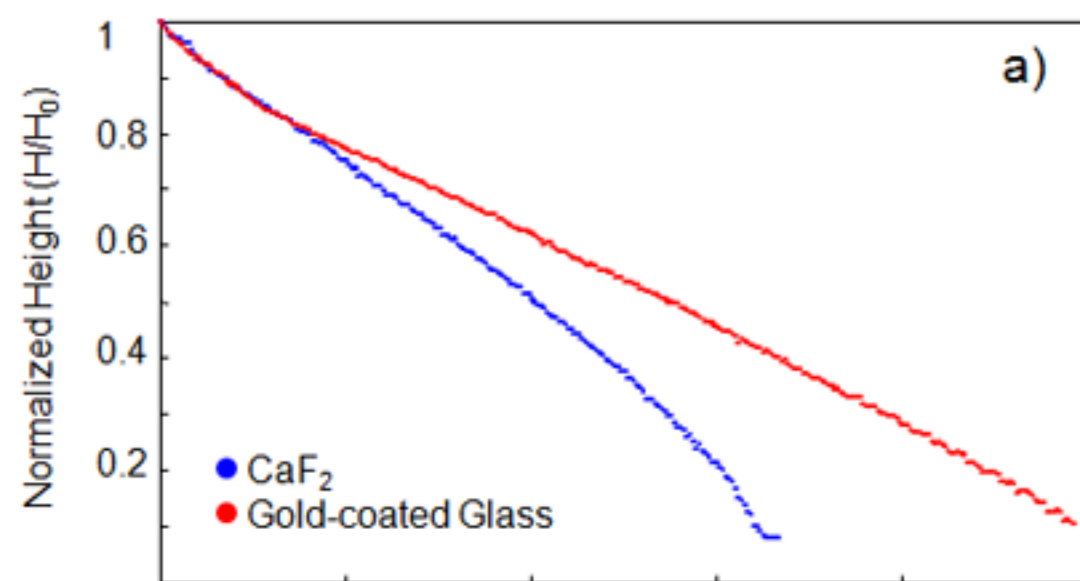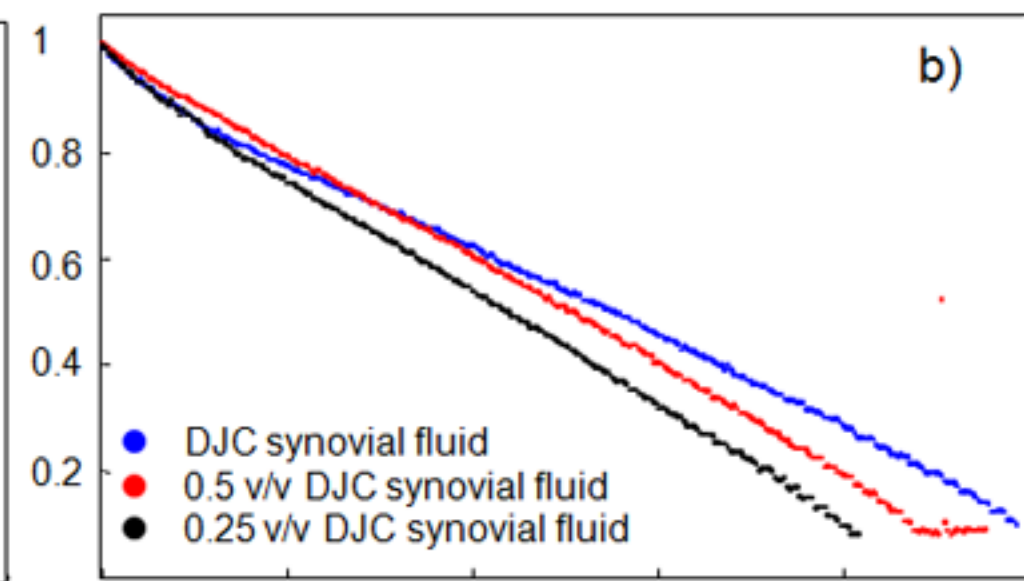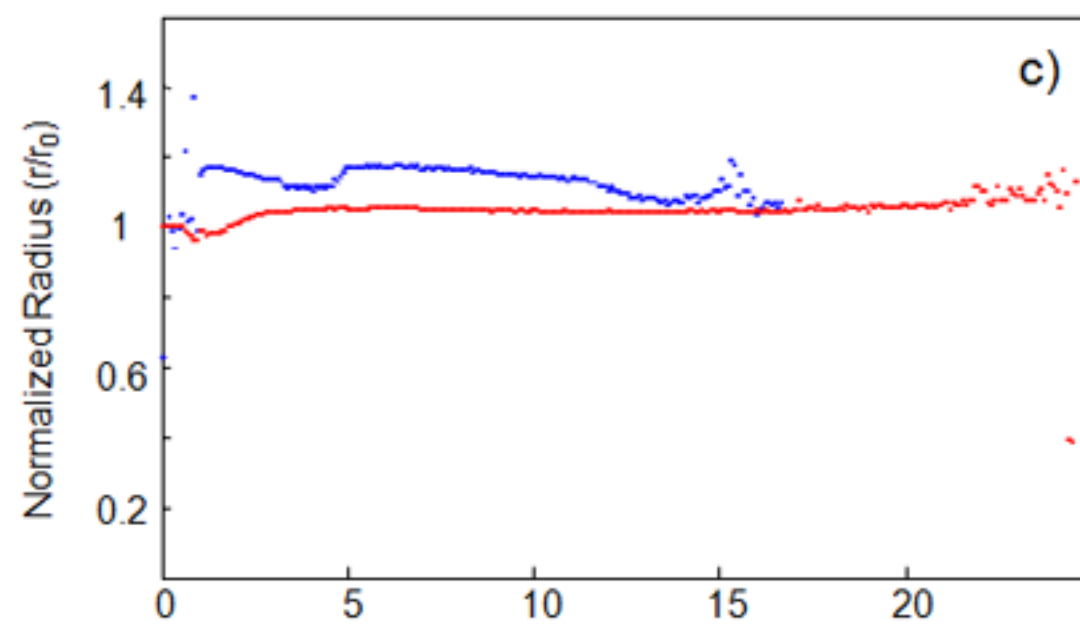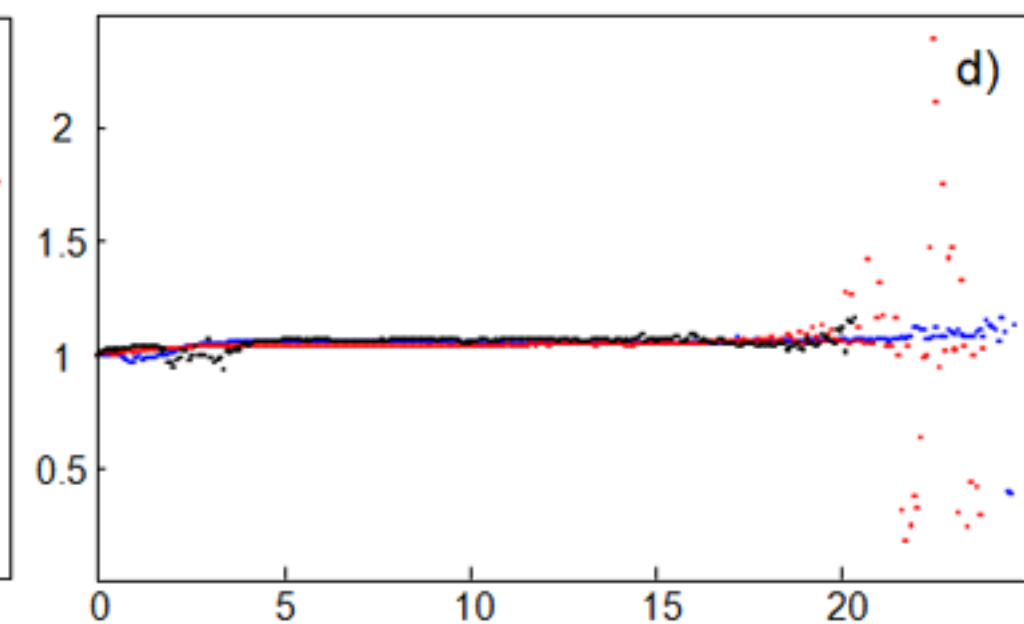

Time (min)

Normal synovial fluid

0.5 v/v

0.25 v/v

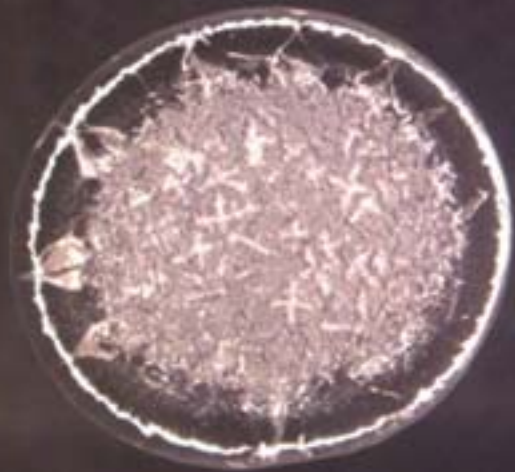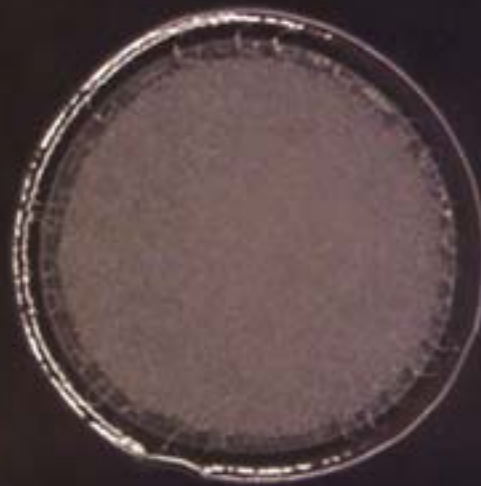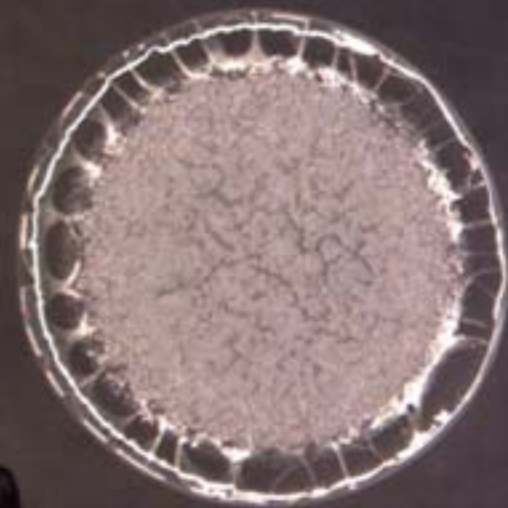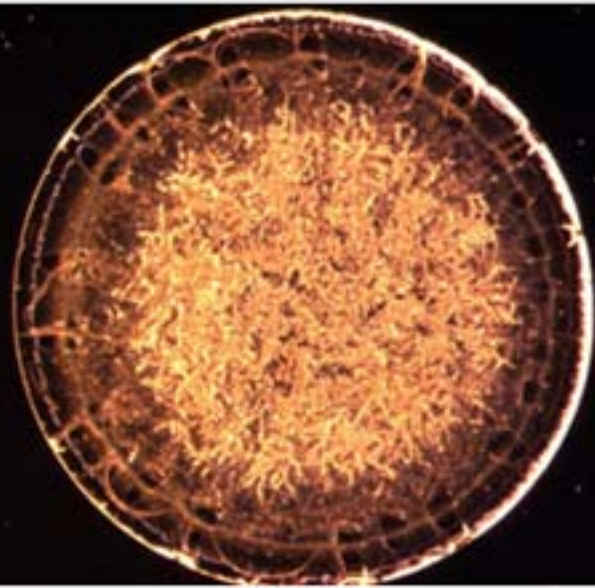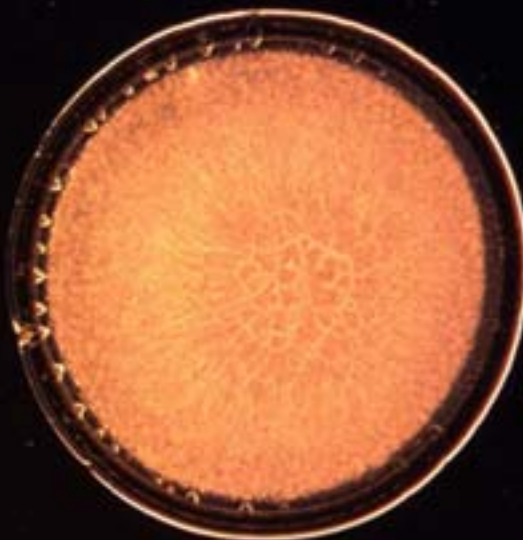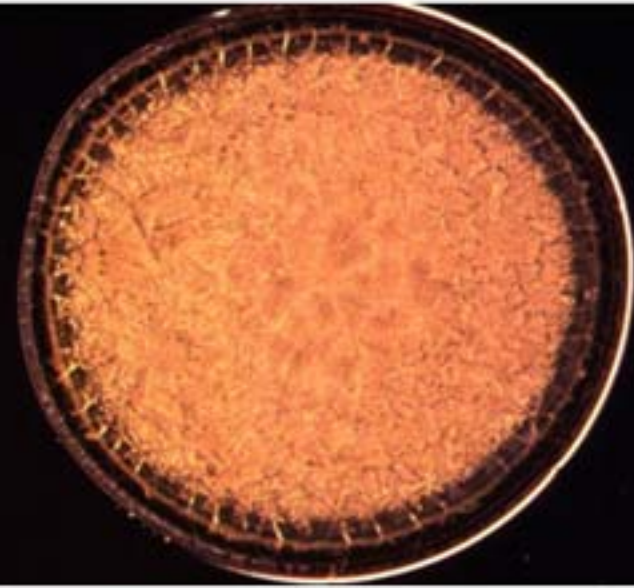

DJC synovial fluid

0.5 v/v

0.25 v/v

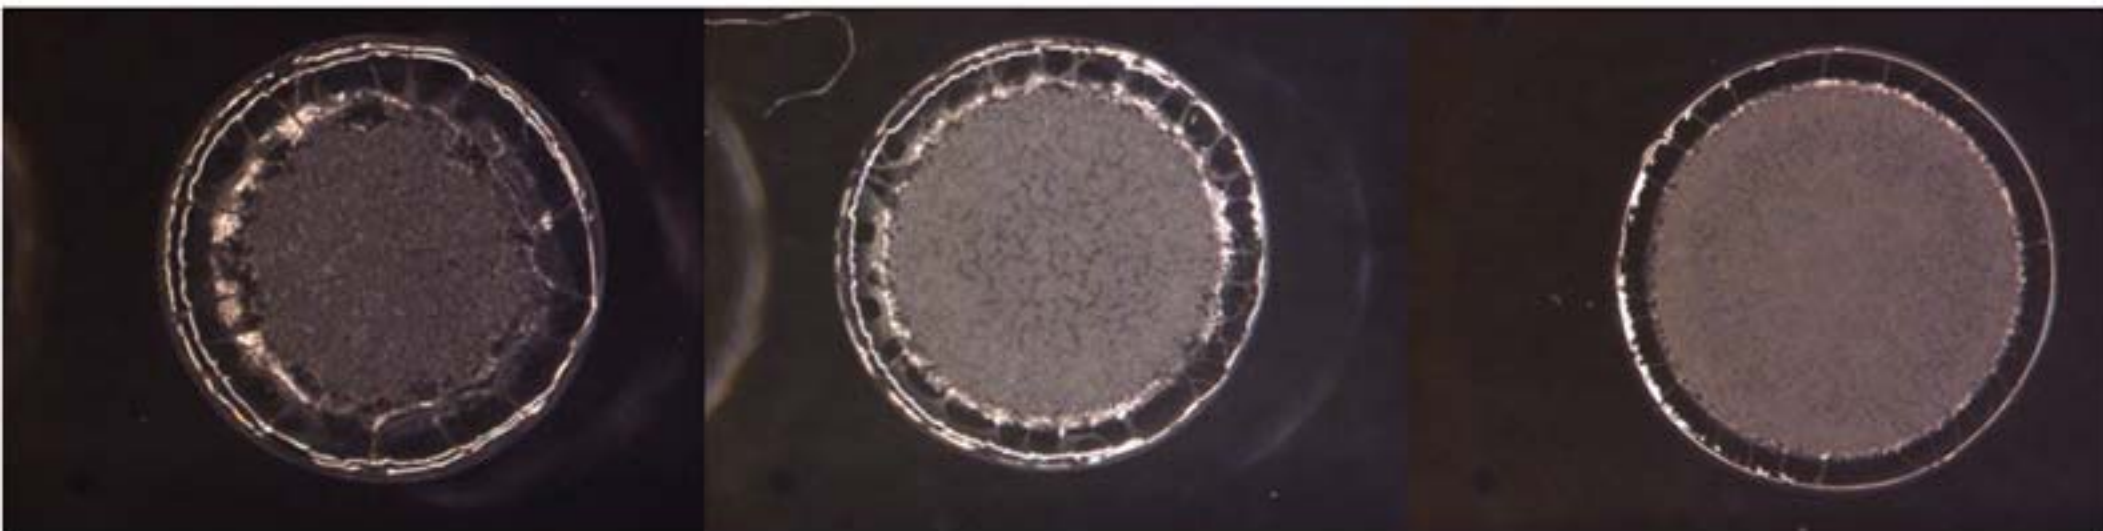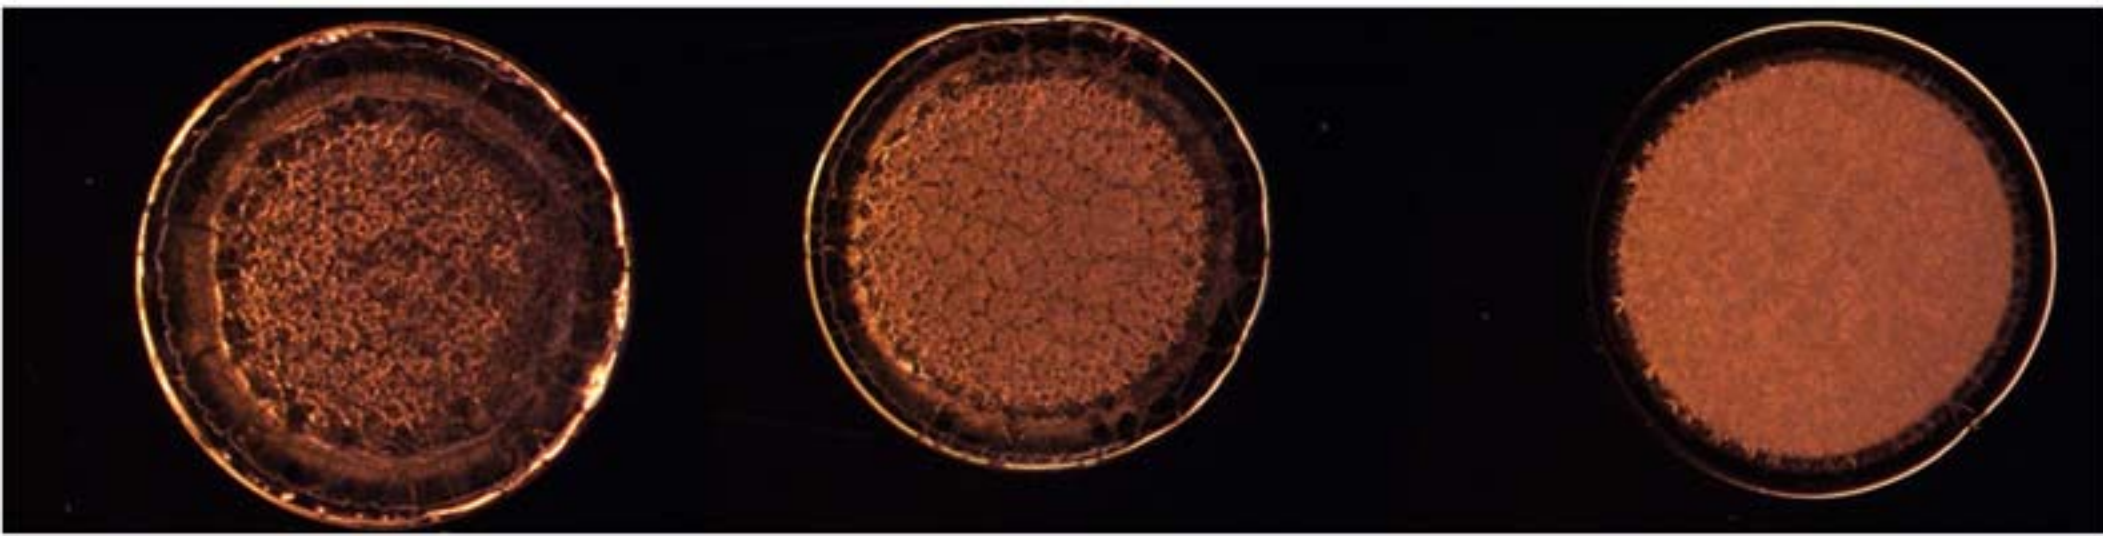

Relative Intensity (A.U.)

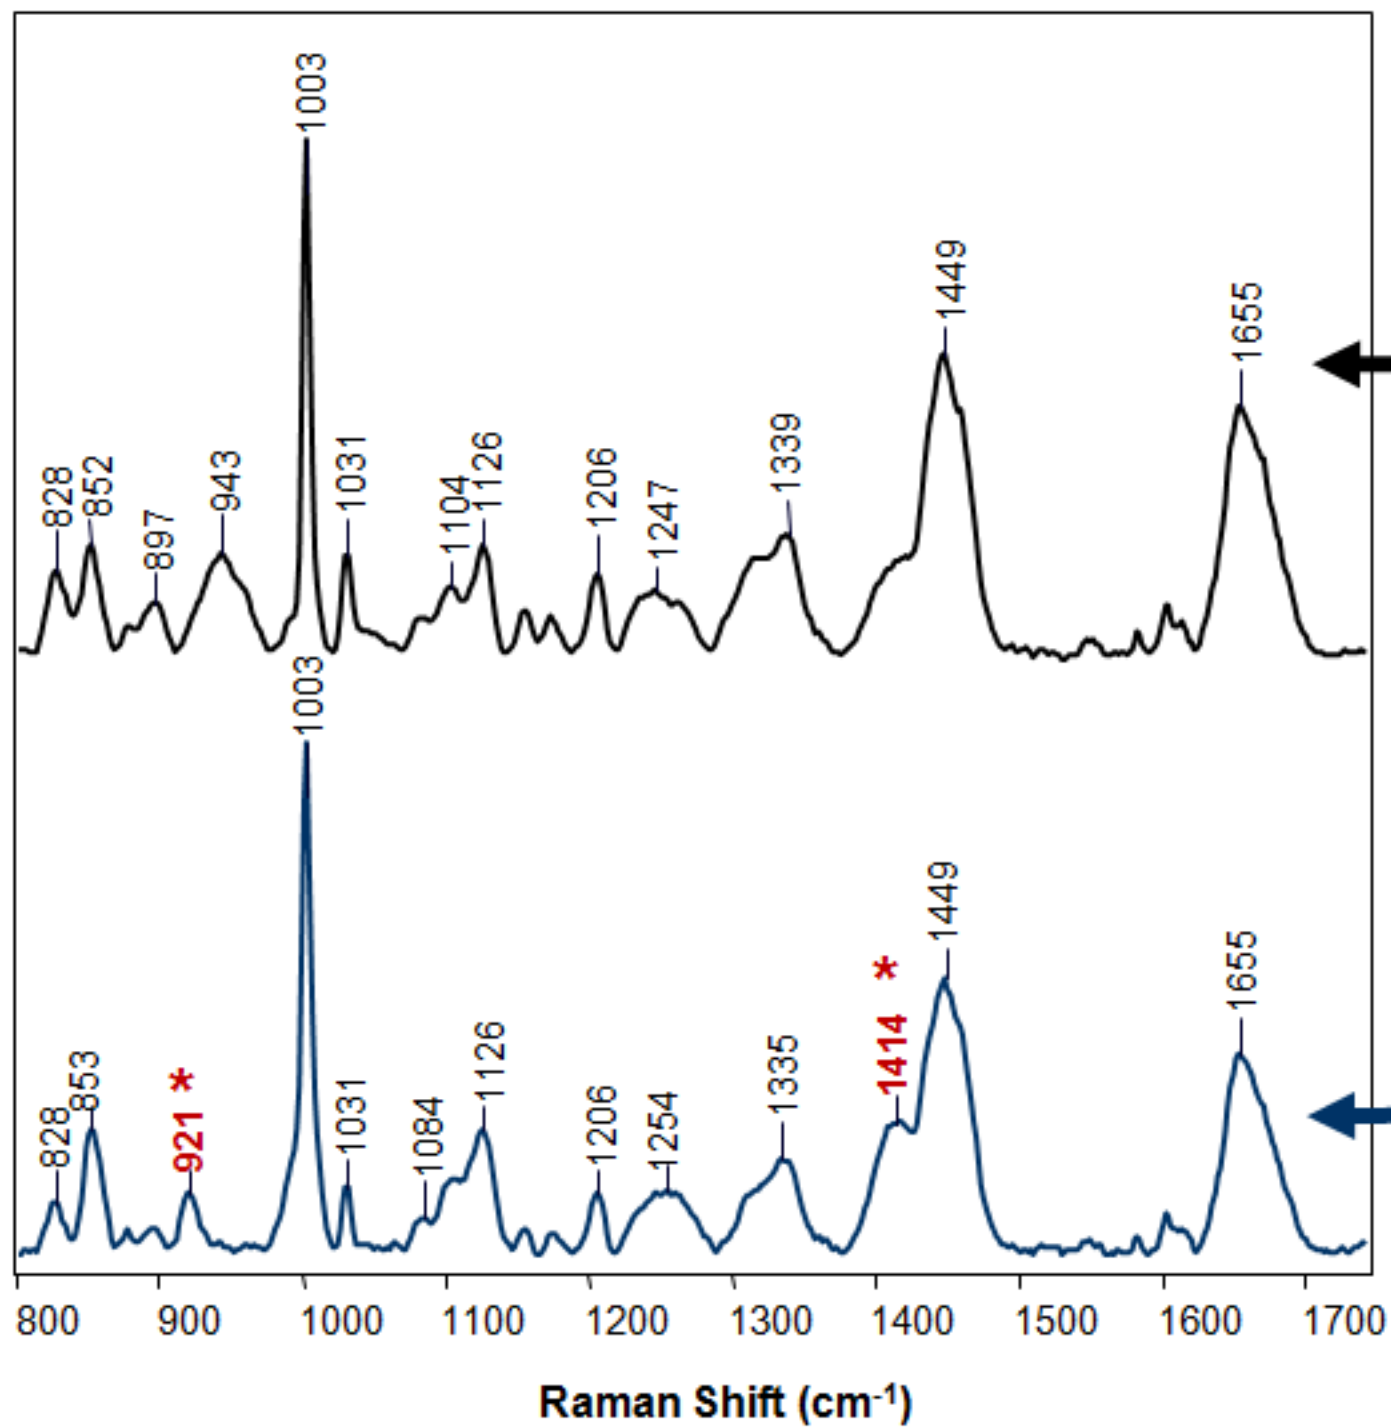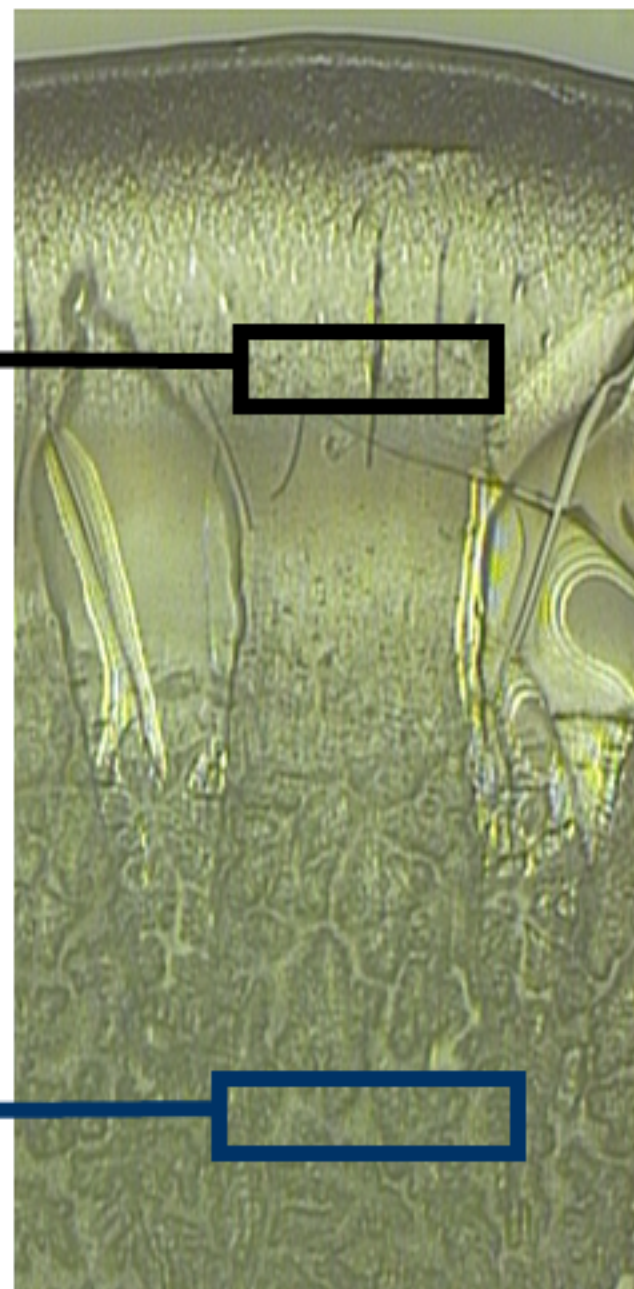

Drop Center

Drop Edge
